# Supplementary material
Source: PubMed Central journal article supplement (PMC10527231)

## **Supplemental Materials.**

**Supplemental Fig. 1. Lung tumor sizes in irradiated and non-irradiated groups.** Tumor-bearing left lung lobes of mice were photographed using a scale as size reference at day 5 (A) and day 8 (B) after radiation treatment. The H&E staining of the whole lung lobes with the tumors were shown at day 5 (C) and day 8 (D) after radiation treatment.

**Supplemental Fig. 2. FLASH<sup>Pr</sup> shows reduced lung tumor burden compared to Control and CONV<sup>Pr</sup>.** (A) Representative H&E-stained microscopic images of individual tumors at day 5 post radiation. (B) Immunofluorescence staining for mCherry-labelled (Red) tumor cells shows significant reduction of tumor burden at day 5 in FLASH<sup>Pr</sup> group compared to control and CONV<sup>Pr</sup>. Nuclei were counterstained with DAPI (Scale bar 500  $\mu$ m). (C) Representative H&E-stained microscopic images of individual tumors at day 8 post radiation. (D) Immunofluorescence staining for mCherry-labelled (Red) tumor cells shows significant reduction of tumor burden at day 8 in FLASH<sup>Pr</sup> group compared to control and CONV<sup>Pr</sup>. Nuclei were counterstained with DAPI (Scale bar 500  $\mu$ m).

**Supplemental Fig. 3. FLASH<sup>Pr</sup> treated tumors present increased number of apoptotic tumor cells.** (A) Representative images show distribution of Cleaved Caspase – 3<sup>+</sup> tumor cells in proton-treated and untreated lung tumors at day 5 and day 8. LLC tumor cells are shown in red (Scale bar 100  $\mu$ m). (B) Number of Cleaved Caspase – 3<sup>+</sup> tumor cells were counted for each biological replicate and presented as percentage of apoptotic tumor cells per field  $\pm$  SEM. At least five random fields per group were used to calculate percentage of Cleaved Caspase -3<sup>+</sup> tumor cells and presented as mean percentage  $\pm$  SEM. N=3-4 per group. \*, P<0.05; \*\*, P<0.01; \*\*\*, P<0.001.

**Supplemental Fig. 4. FLASH<sup>pr</sup> reduces the number of macrophages and increases the infiltration of T cells in tumors.** (A) Average infiltrated distance of CD8<sup>+</sup> cells from tumor edge into the tumor in different proton-irradiated groups at day 5 and day 8 post radiation. Measurement of infiltration distance was performed for individual CD8<sup>+</sup> cells and presented as mean  $\pm$  SEM. \*, P<0.05; \*\*, P<0.01; \*\*\*\*, P<0.001. (B-C) Representative images show distribution of F4/80<sup>+</sup> macrophages (white) in proton-treated and untreated lung tumors at day 5. LLC tumor cells are shown in red and nuclei are counterstained with DAPI (Scale bar 200  $\mu$ m). Number of mCherry<sup>+</sup> tumor cells and F4/80<sup>+</sup> macrophages were counted for each biological replicate and presented as the ratio of macrophages to tumor cells per field  $\pm$  SEM. (D-E) Co-localization studies show the distribution of CD8<sup>+</sup> cytotoxic T-cells (green) and F4/80<sup>+</sup> tumor-associated macrophages (white) among the mCherry-labelled tumor cells (red) in lung tumors of different treatment groups at day 5 (Scale bar 200  $\mu$ m). Inserts are 20X images showing CD8<sup>+</sup> cytotoxic T cells (green) and F4/80<sup>+</sup> tumor-associated macrophages (white). Graphs show the ratio of CD8<sup>+</sup> T-lymphocytes to F4/80<sup>+</sup> macrophages per tumor. Data is representative of complete tumor fields and presented as mean ratio  $\pm$  SEM. N= 8 per group. \*, P<0.05; \*\*, P<0.01; \*\*\*, P<0.001.

**Supplemental Fig. 5. FLASH<sup>pr</sup> shows reduced lung tumor burden compared to Control and CONV<sup>pr</sup>.** (A-B) Representative images show CD163<sup>+</sup> M2-like macrophages (green) with number of mCherry<sup>+</sup> tumor cells after proton radiation at day 5 and day 8. Nuclei were counterstained with DAPI (Magnification 200x). Graphs are representative of correlation of numbers of CD163<sup>+</sup> cells and tumor cells in random fields distributed across groups. (C-D) Representative images show the distribution of iNOS<sup>+</sup> M1-like macrophages (green) in tumors after FLASH<sup>pr</sup> and CONV<sup>pr</sup> radiation. Tissue sections were counterstained with DAPI (Magnification 200x). Graph shows

correlation of iNOS<sup>+</sup> cells and tumor cells in random fields distributed across groups. N = 3-8 mice per group. \*, P<0.05; \*\*, P<0.01; \*\*\*, P<0.001.

**Supplemental Fig. 6. (A)** Co-localization studies demonstrate the decrease in the number of CD163<sup>+</sup> cells (red) and the increase in the number of CD3<sup>+</sup> T-lymphocytes (green) in the irradiated lung tumors compared to untreated tumors. Representative images of CD3<sup>+</sup> T-cells and CD163<sup>+</sup> cells at day 5 (Scale bar 100  $\mu$ m). **(B)** Co-localization studies demonstrate the increase in the number of iNOS<sup>+</sup> cells (red) and the increase in the number of CD3<sup>+</sup> T-lymphocytes (green) in the radiation-treated lung tumors compared to untreated tumors. Representative images of CD3<sup>+</sup> T-cells and iNOS<sup>+</sup> cells distribution at day 5 (Scale bar 100  $\mu$ m).

**Supplemental Fig. 7. FLASH<sup>Pr</sup> inhibits expression of checkpoint inhibitors PD-1 and PD-L1. (A-B)** Co-localization studies show the expression of PD-1 (red) among CD3<sup>+</sup> T-lymphocytes (green) in lung tumors of different treatment groups at day 5. Nuclei were counterstained with DAPI (Scale bar 50  $\mu$ m). At least five random fields per group were used to calculate percentage of PD-1<sup>+</sup> T-lymphocytes and presented as mean percentage  $\pm$  SEM. N=3 per group. \*, P<0.05; \*\*, P<0.01; \*\*\*, P<0.001. **(C-D)** Co-localization studies show the expression of PD-L1 (green) among lung tumor cells (red) in different treatment groups at day 5. Nuclei were counterstained with DAPI (Scale bar 50  $\mu$ m). At least five random fields per group were used to calculate percentage of PD-L1<sup>+</sup> tumor cells and presented as mean ratio  $\pm$  SEM. N=3 per group. \*, P<0.05; \*\*, P<0.01; \*\*\*, P<0.001.

Supplemental Fig.1

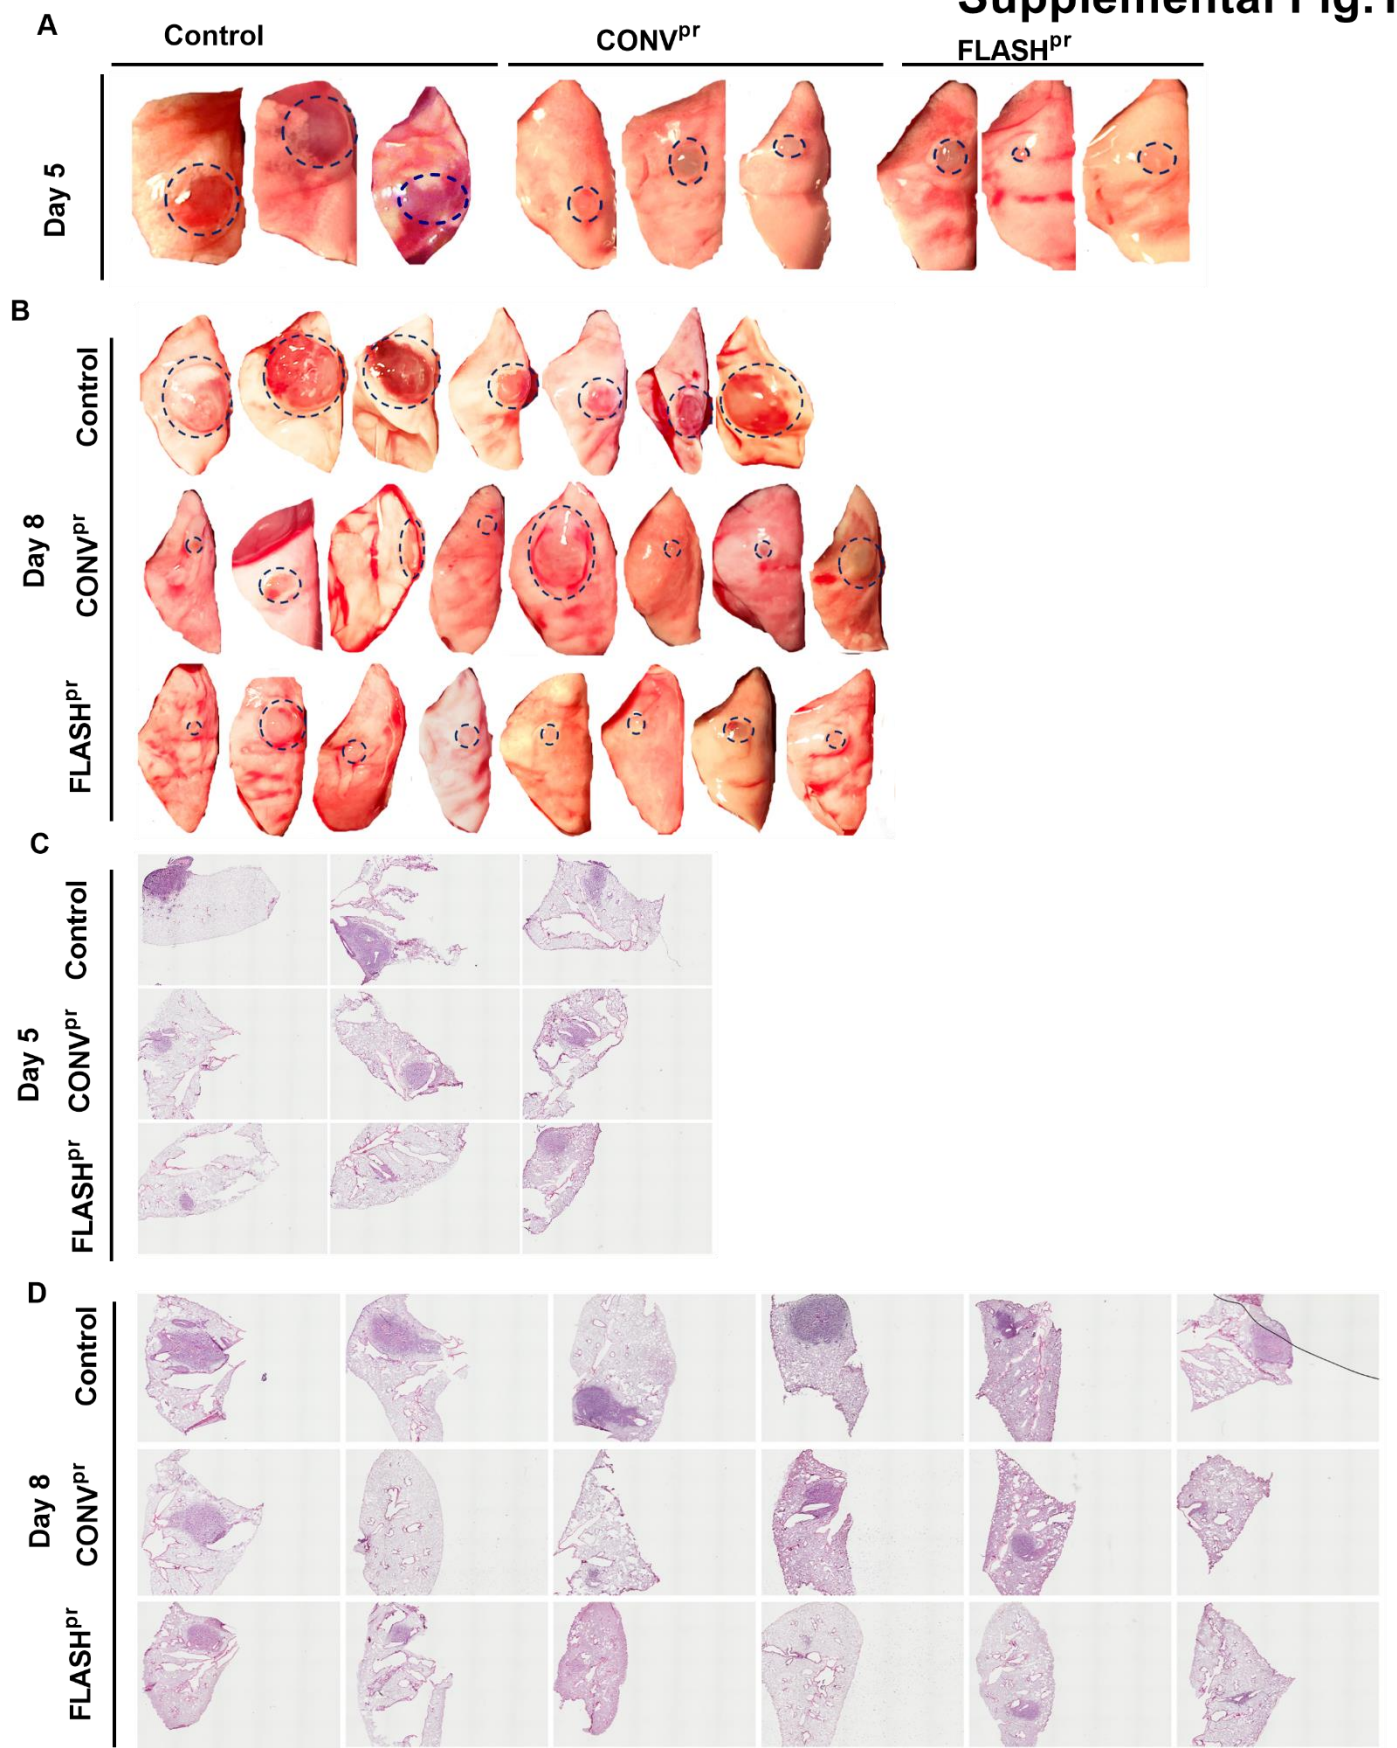

Supplemental Fig.2

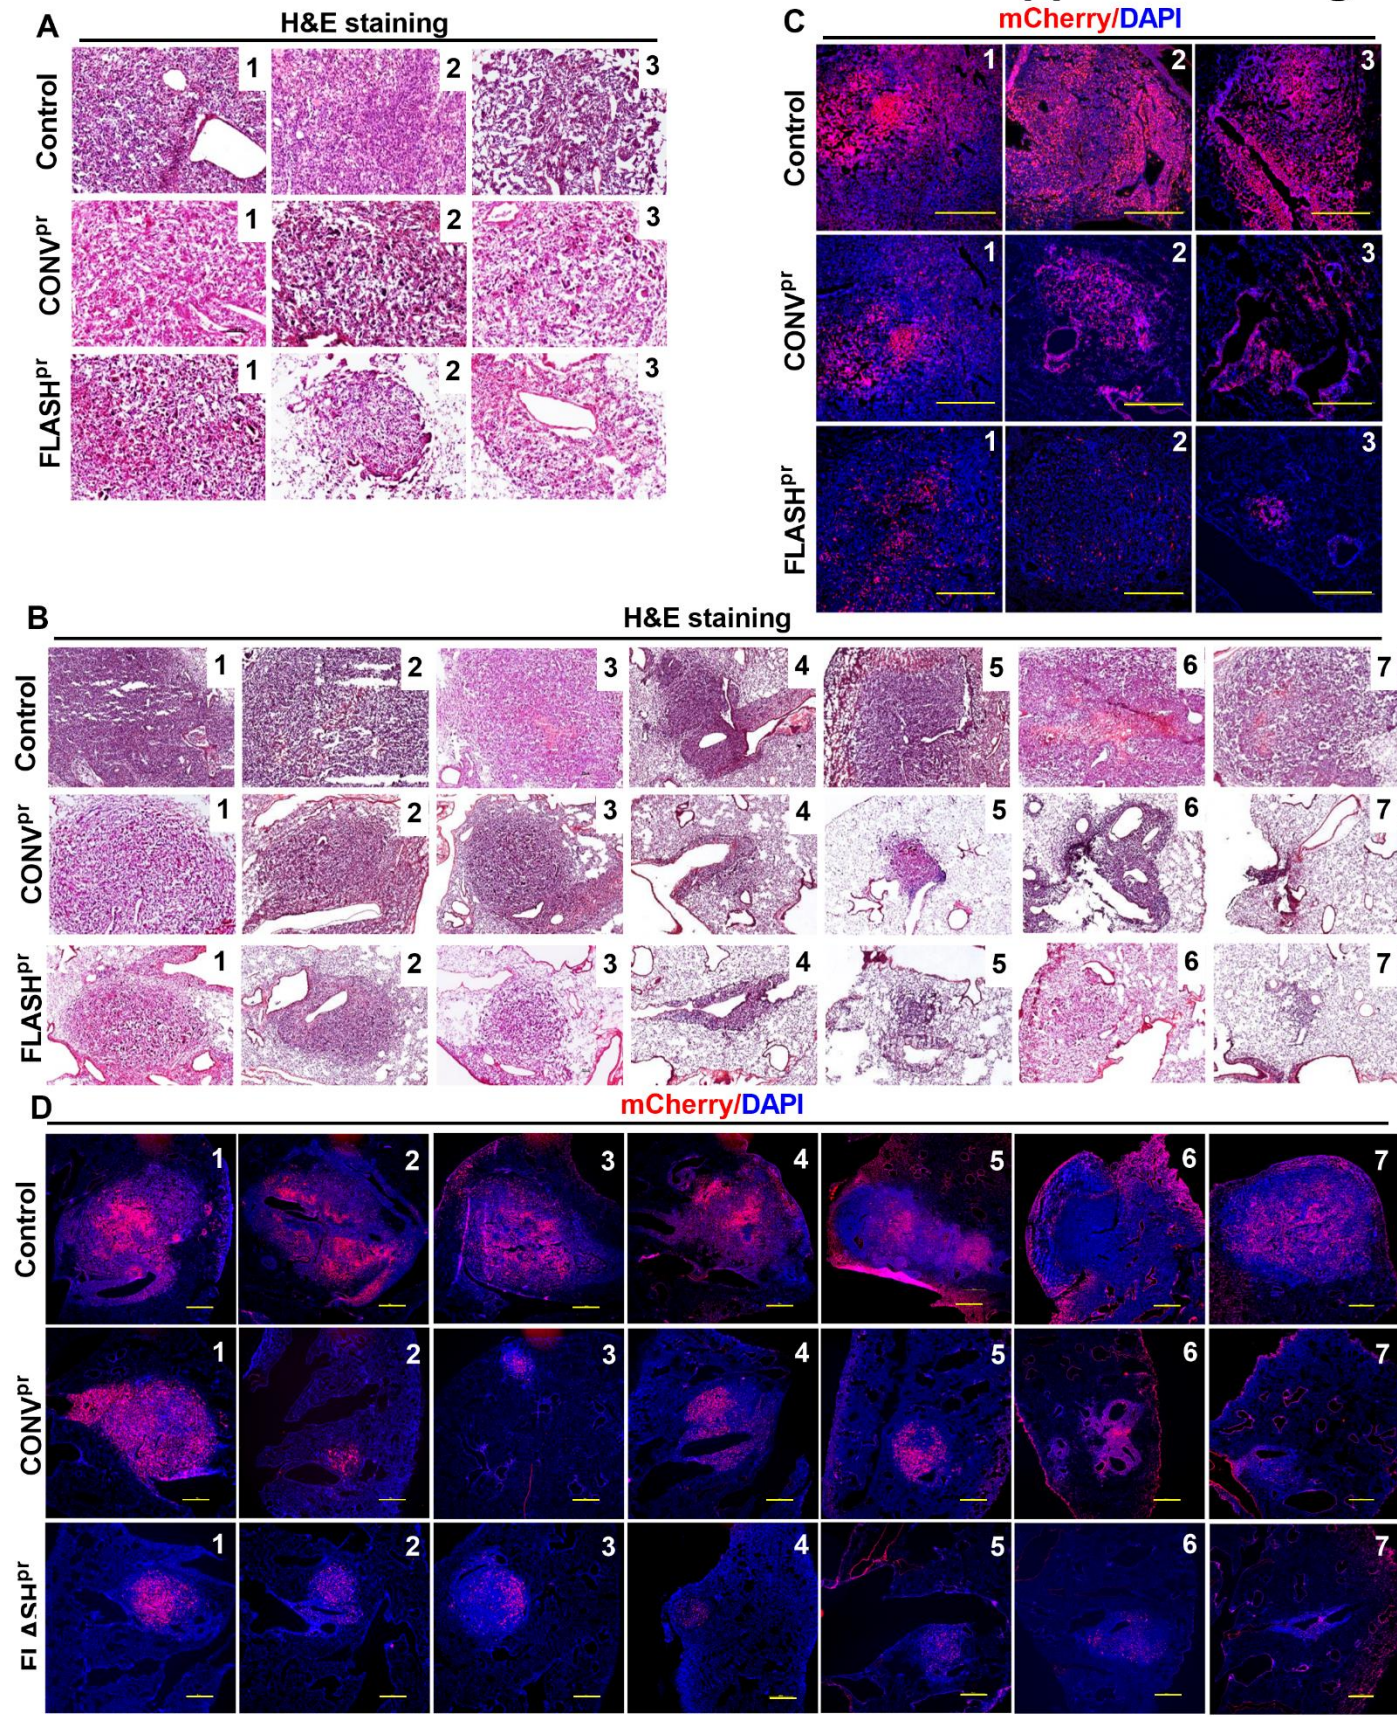

Supplemental Fig.3

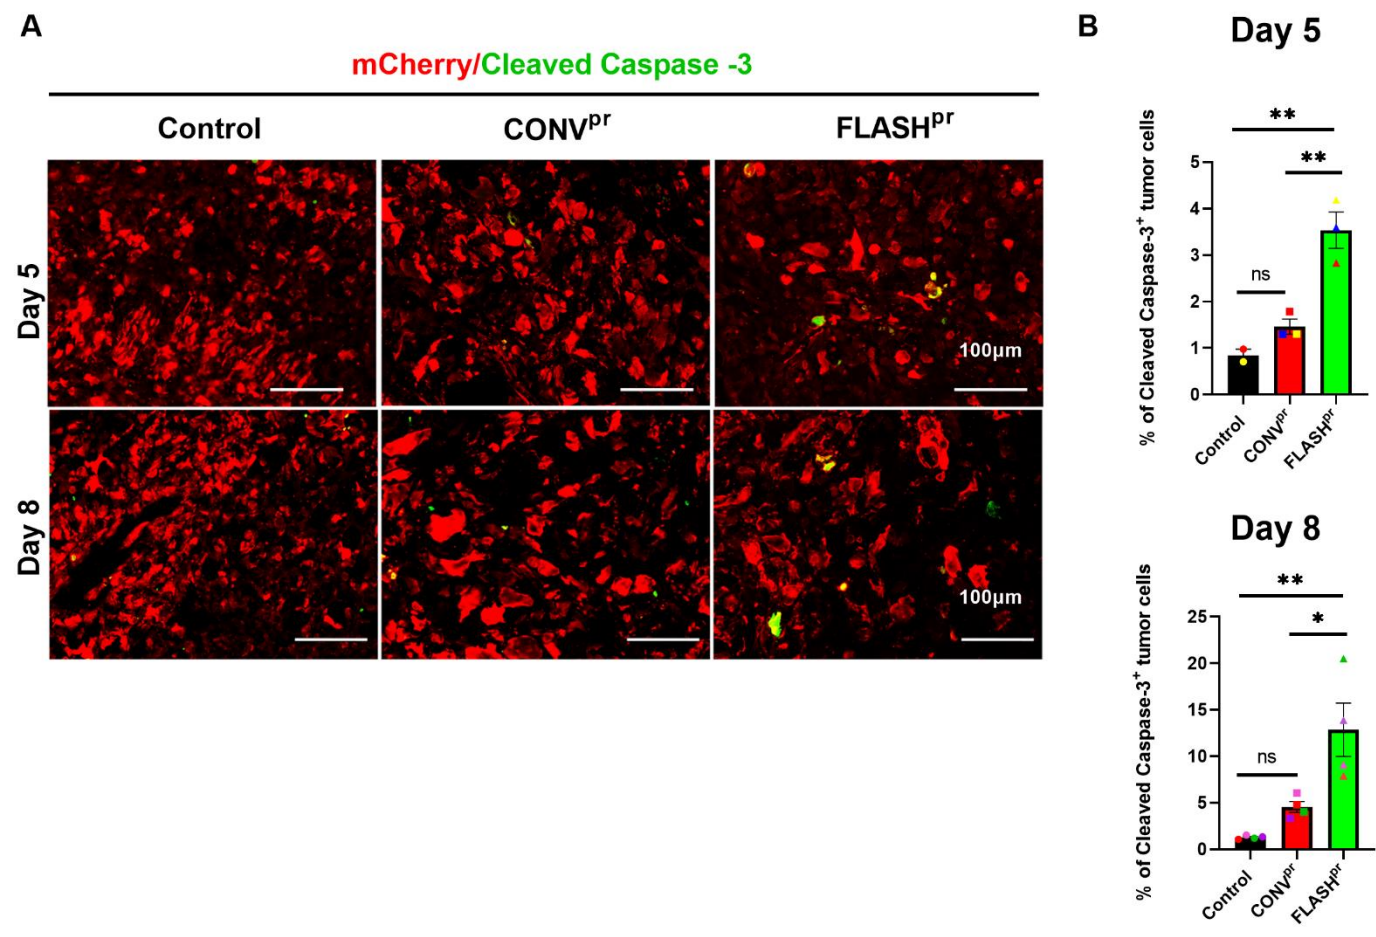

Supplemental Fig. 4

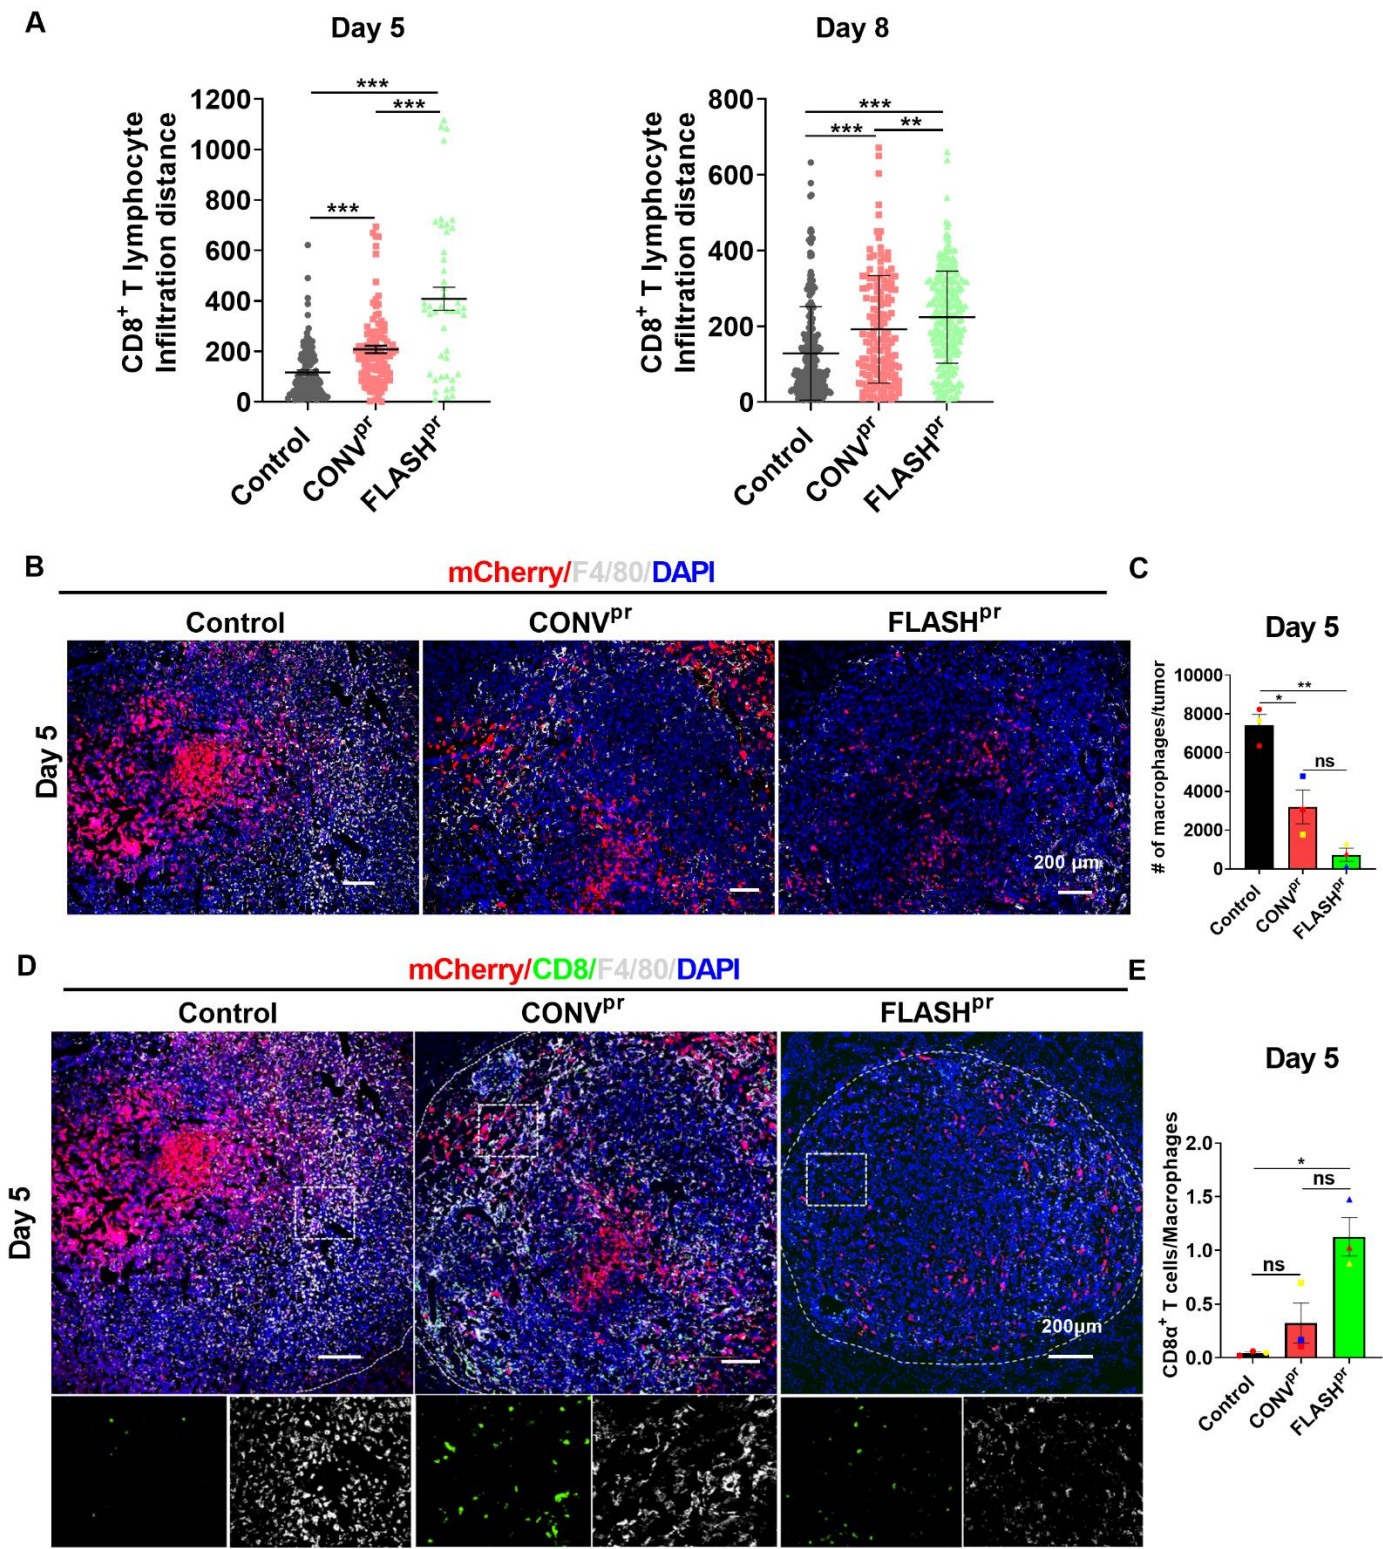

Supplemental Fig. 5

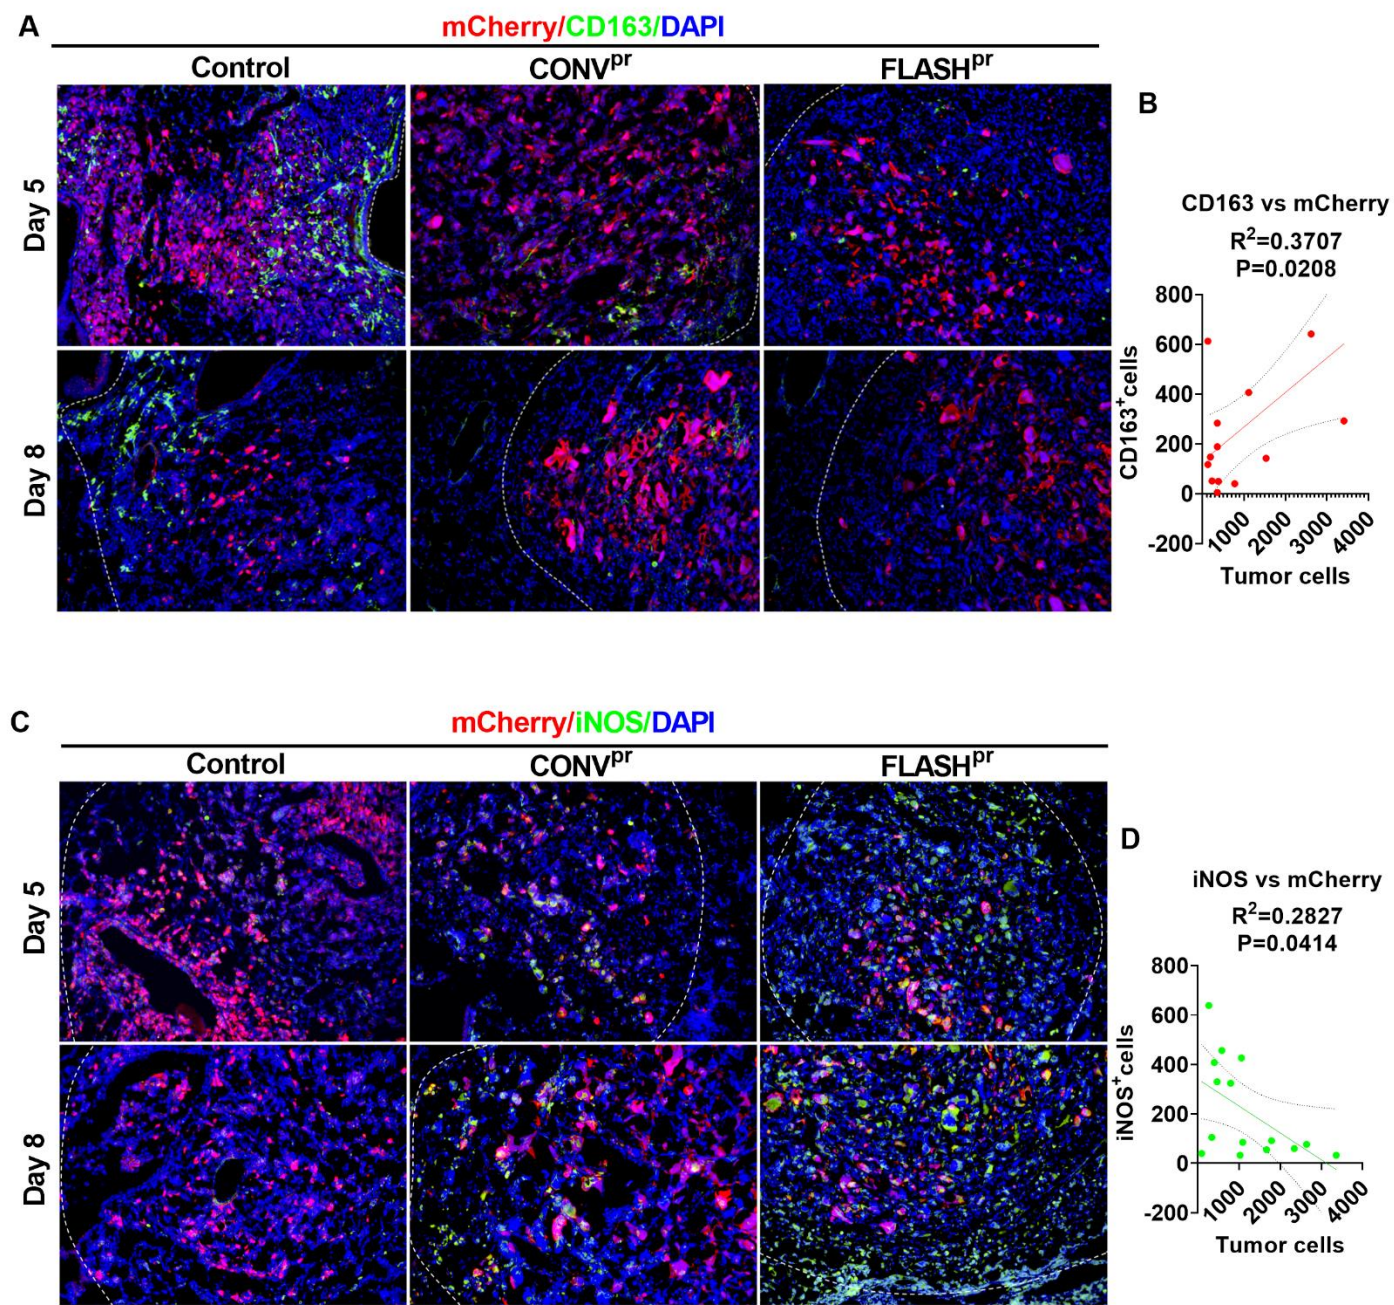

## Supplemental Fig. 6

A

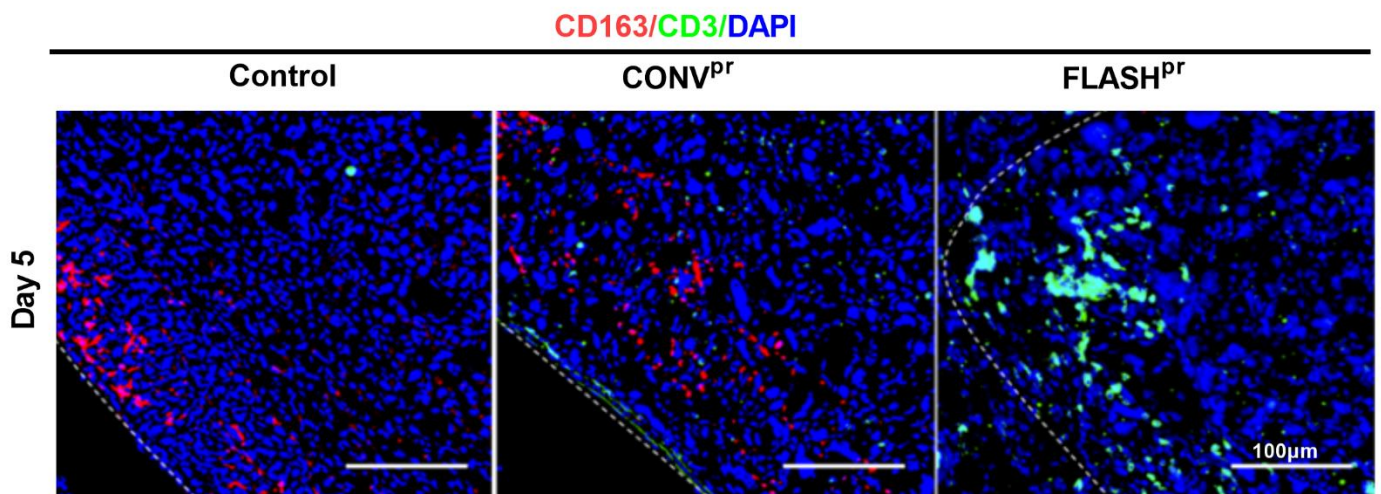

B

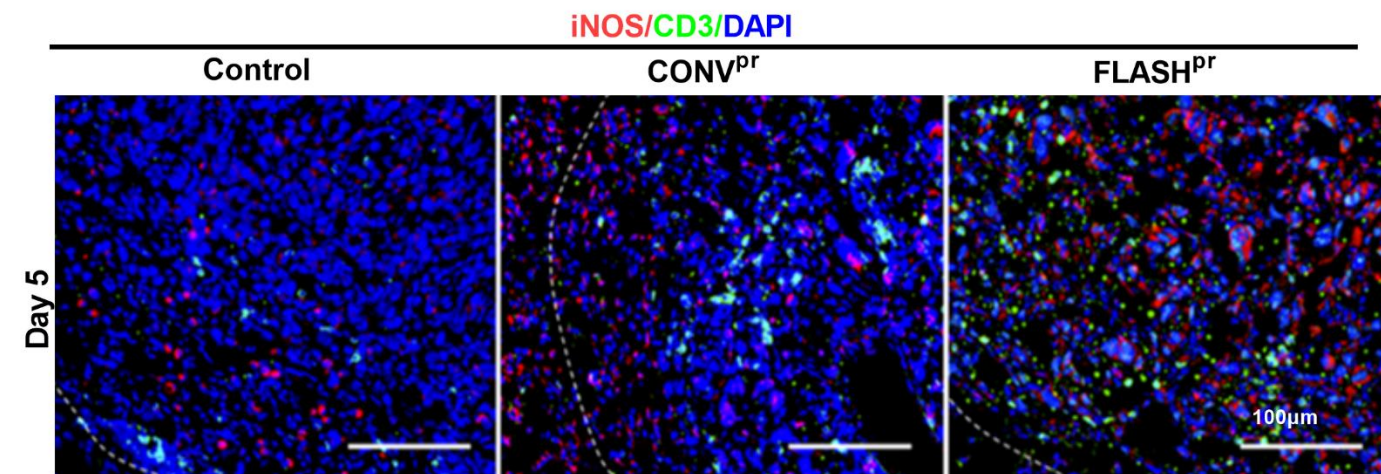

# Supplemental Fig. 7

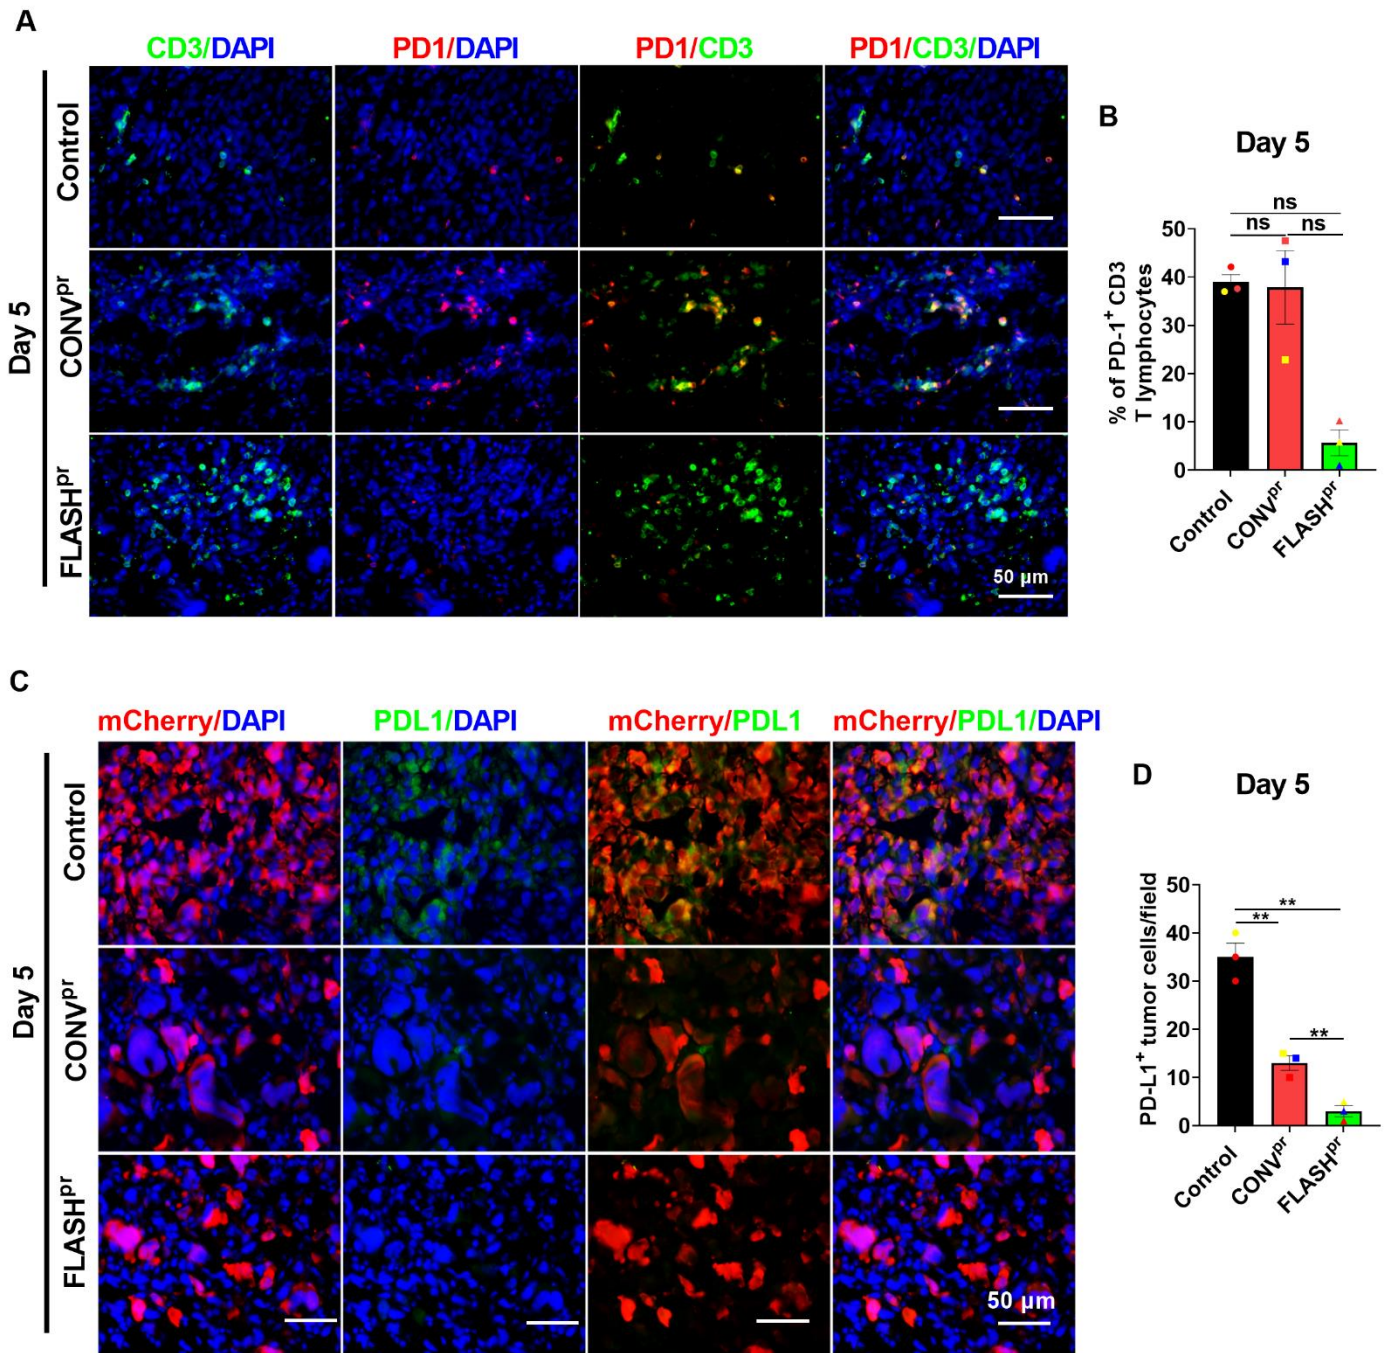

Supplement: NIHMS1909193-supplement-MMC1.pdf [file NIHMS1909193-supplement-MMC1.pdf]
